# Supplementary material for: Concomitant Activation of OsNAS2 and OsNAS3 Contributes to the Enhanced Accumulation of Iron and Zinc in Rice
Source: MDPI journal article supplement (doi:10.3390/ijms24076568), 2023-03-31
Supplement: s1 [file s1]

## Supplementary Data

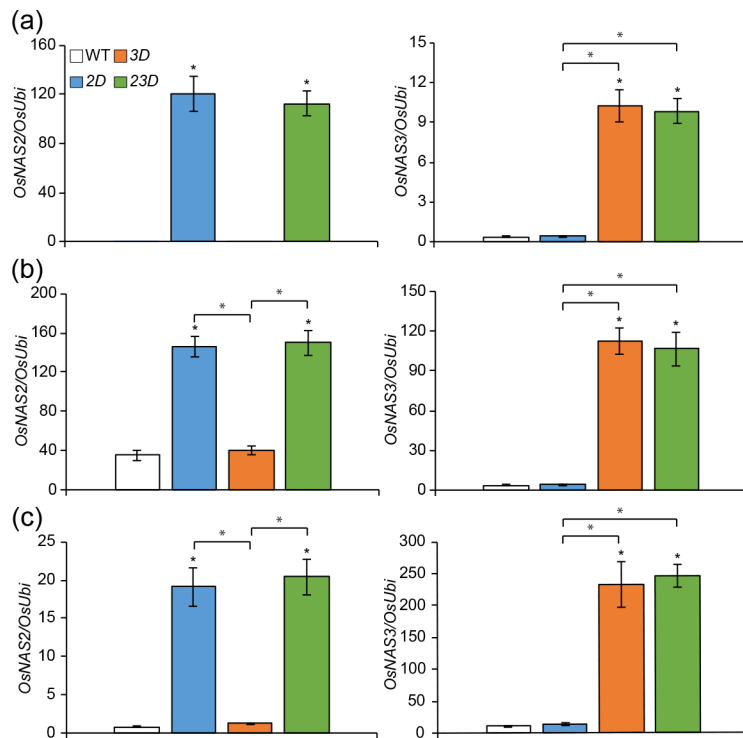

**Figure S1.** Real-time PCR analysis of WT and activation-tagged mutants. Expression levels of *OsNAS2* and *OsNAS3* were analyzed, using RNA from 7-day-old shoots (a) and roots (b) grown in  $\frac{1}{2}$  MS medium, and flag leaves (c) at 10 days after heading. Transcript levels are represented by ratios between *OsNAS2* or *OsNAS3* genes and the rice *ubiquitin* gene. Data are given as the mean  $\pm$  SE ( $n = 3$ ). WT indicates segregant wild-type plant; *2D*, *OsNAS2* activation-tagged mutant; *3D*, *OsNAS3* activation-tagged mutant; *23D*, the double activation-tagged mutant of *OsNAS2* and *OsNAS3*. Significant differences among WT and mutants plants are indicated with an asterisk (\*  $p < 0.05$  by Student's *t*-test).

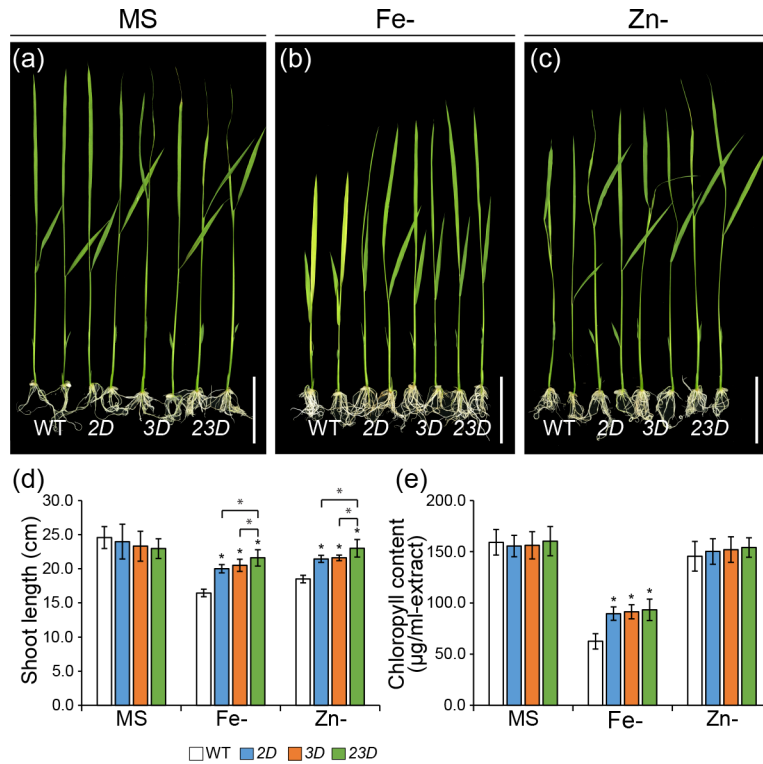

**Figure S2.** Growth of WT and activation-tagged mutants to Fe and Zn deficiencies. **(a–c)** Phenotypes of WT, *2D*, *3D*, and *23D* under control  $\frac{1}{2}$  strength MS solid medium (MS), or in Fe-deficient (Fe-) or Zn-deficient (Zn-) media for 15 days. Bars = 5 cm. Shoot lengths **(d)** and total chlorophyll concentrations **(e)** of WT and activation tagging mutants. WT indicates segregant wild-type plant; *2D*, *OsNAS2* activation-tagged mutant; *3D*, *OsNAS3* activation-tagged mutant; *23D*, double activation of *OsNAS2* and *OsNAS3*. Data are mean  $\pm$  SE ( $n = 10$  for plant height;  $n = 4$  for chlorophyll contents). Significant differences among WT and mutants plants are indicated with an asterisk (\*  $p < 0.05$  by Student's  $t$ -test).

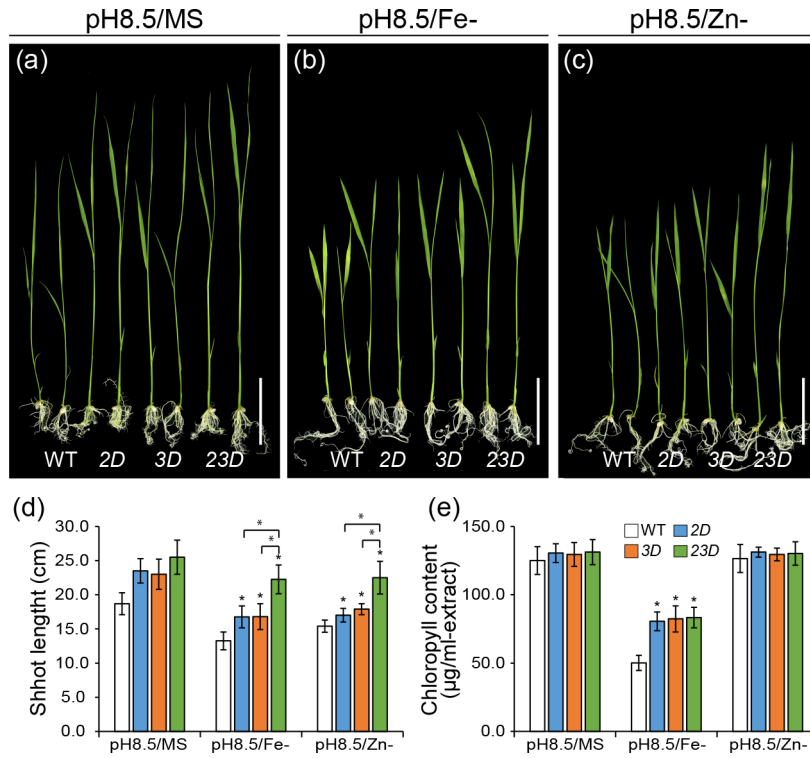

**Figure S3.** Growth test under high pH conditions. (a–c) Phenotypes of WT, 2D, 3D, and 23D grown on alkaline half-strength MS solid medium solution (pH8.5), without Fe (pH8.5/Fe-), or without Zn (pH8.5/Zn-) for 15 days. Bars = 5 cm. Shoot lengths (d) and total chlorophyll concentrations (e) of WT and activation-tagged mutants. Data are mean  $\pm$  SE ( $n = 8$  for plant height;  $n = 4$  for chlorophyll content) and significant differences between among WT and mutant plants are indicated with an asterisk (\*  $p < 0.05$  by Student's  $t$ -test).

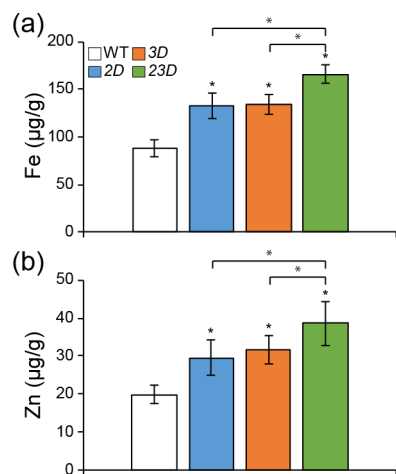

**Figure S4.** Measurement of Fe and Zn levels in flag leaves. Concentrations of Fe (**a**) and Zn (**b**) in flag leaves 10 days after heading. Error bars represent SE. Significant differences among WT and mutant plants are determined by Student's *t*-tests, \*  $p < 0.05$ .

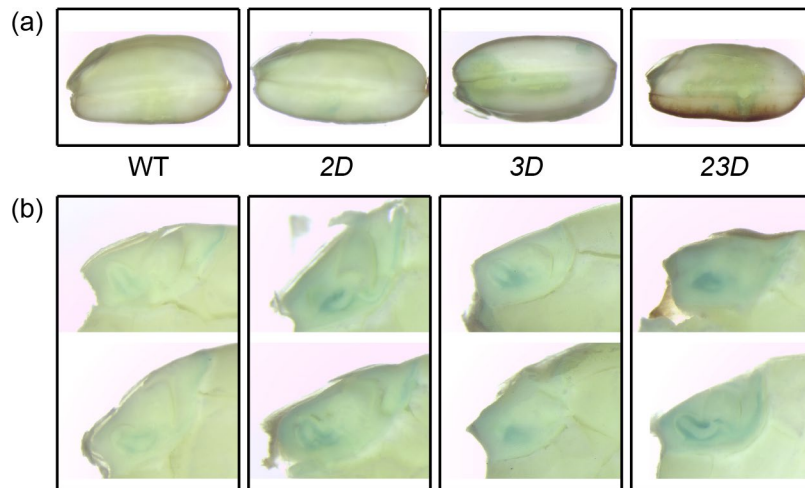

**Figure S5.** Fe distribution and intensity of the mature seeds. Perl's Prussian staining of unpolished grains **(a)** and embryos **(b)** from WT and activation tagging mutants. WT indicates segregant wild-type plant; 2D, *OsNAS2*-activation tagging mutant; 3D, *OsNAS3*-activation tagging mutant; 23D, double-activation of *OsNAS2* and *OsNAS3*.

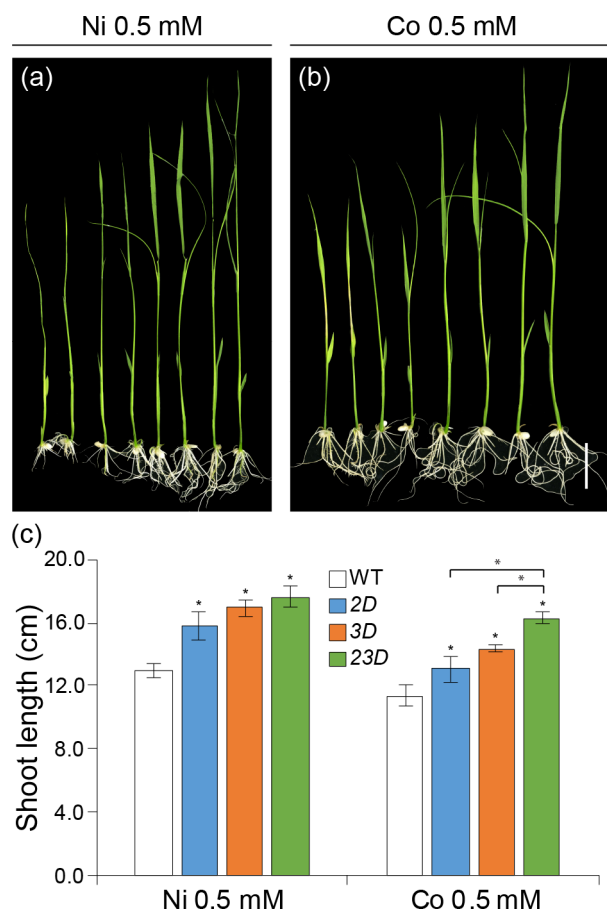

**Figure S6.** Growth test under the excess metal treatment. **(a,b)** Phenotypes of WT, *2D*, *3D*, and *23D* grown on ½ strength MS solid containing 0.5 mM NiCl<sub>2</sub> **(a)** or 0.5 mM CoCl<sub>2</sub> **(b)** for 10 days. Bars = 5 cm. **(c)** Shoot lengths of WT and activation-tagged mutants. Data are mean ± SE (n = 8) and significant differences among WT and mutant plants are indicated with an asterisk (\*  $p < 0.05$  by Student's *t*-test).

**Table S1.** Primers used in this study.

| Primer                    | Sequence                             |
|---------------------------|--------------------------------------|
| <i>OsNAS2</i> -forward    | 5'-CGTCTGAGTGCGTGCATAGTA-3'          |
| <i>OsNAS2</i> -reverse    | 5'-GAAGCACAAACACAAACCGATA-3'         |
| <i>OsNAS3</i> -forward    | 5'-GTGATCAACTCCGTCATCATC-3'          |
| <i>OsNAS3</i> -forward    | 5'-TCAGTCTCATCATGGGAAAAA-3'          |
| <i>OsUbi</i> -forward     | 5'-CTGCTGCTGTTCTAGGGTTCAC-3'         |
| <i>OsUbi</i> -reverse     | 5'-CAAAACGTTTCAGACACCATCA-3'         |
| <i>OsZIP4</i> -forward    | 5'-GCGAAAGCAACAGTGATCATGGCGACTTTC-3' |
| <i>OsZIP4</i> -reverse    | 5'-GCAGCTCTTGGTTGCTCTGAAGATCTCATG-3' |
| <i>OsZIP5</i> -forward    | 5'-CTGGAGCTGGGAGTGGTGGT-3'           |
| <i>OsZIP5</i> -reverse    | 5'-ATGTCGACGAGCGCCATGTA-3'           |
| <i>OsNAAT1</i> -forward   | 5'-TAAGAGGATAATTGATTTGCTTAC-3'       |
| <i>OsNAAT1</i> -reverse   | 5'-CTGATCATTCCTCAATCCTAGTACAAT-3'    |
| <i>OsDMAS1</i> -forward   | 5'-GCCGGCATCCCGCAGCGGAAGATCA-3'      |
| <i>OsDMAS1</i> -reverse   | 5'-CTCTCTCTCTCGCACCTGCTAGCGT-3'      |
| <i>OsIRT1</i> -forward    | 5'-ATTCGCTGCATTGTTAGATTGA-3'         |
| <i>OsIRT1</i> -reverse    | 5'-CATCATCAGTCACGAAGAACAAA-3'        |
| <i>OsOSYSL2</i> -forward  | 5'-TCTGCTGGCTTCTTTGCATTTTCTG-3'      |
| <i>OsOSYSL2</i> -reverse  | 5'-ACCATGTCGAACTCAGCATCCAGGA-3'      |
| <i>OsOSYSL15</i> -forward | 5'-GCGTTCGCCGTGCTCACGAACGTGG-3'      |
| <i>OsOSYSL15</i> -reverse | 5'-ATCCTCCACCCATGAAATTAAACAC-3'      |
| <i>OsFer1</i> - forward   | 5'-TGGAAGCTGCGGGTATCCAT-3'           |
| <i>OsFer1</i> -reverse    | 5'-TACTCAGCCTTGGCAATCCACA-3'         |
